# Supplementary material for: The bioaccumulation testing strategy for nanomaterials: correlations with particle properties and a meta-analysis ofin vitrofish alternatives toin vivofish tests
Source: Royal Society of Chemistry journal article supplement (doi:10.1039/d1en00694k), 2022-01-01
Supplement: d1en00694k1.pdf [file d1en00694k1.pdf]

## Supplementary Material

### **The bioaccumulation testing strategy for nanomaterials: correlations with particle properties and a meta-analysis of *in vitro* fish alternatives to *in vivo* fish tests**

Handy, R.D., Clark, N.J., Boyle, D., Vassallo, J., Green, C., Nasser, F., Botha, T.L., Wepener, V., van den Brink, N.W. and Svendsen, C.

**Supplemental Table S1.** Linear equations for the curve fits of the physico-chemical parameters plotted against calculated biomagnification factors (*n*BMFs) for the materials, as shown in Figure 3 of the main manuscript.

| <b>Panel Letter/Metric</b>         | <b>Fish body organ and Equation</b>      |
|------------------------------------|------------------------------------------|
| Figure 3(D) Primary particle size  | Liver: $y = -0.0709 + 0.0199x$           |
|                                    | Mid intestine: $y = 0.0033 + 0.0013x$    |
|                                    | Hind intestine: $y = -0.0634 + 0.0136x$  |
|                                    | Kidney: $y = -0.0802 + 0.0048x$          |
| Figure 3(E) Hydrodynamic diameter  | Liver: $y = 1.1036 - 0.0060x$            |
|                                    | Mid intestine: $y = 0.0999 - 0.0006x$    |
|                                    | Hind intestine: $y = 0.8245 - 0.0052x$   |
|                                    | Kidney: $y = 0.1539 - 0.0008x$           |
| Figure 3(F) Metal dissolution rate | Liver: $y = 0.0933 + 27.1619x$           |
|                                    | Mid intestine: $y = 0.0003 + 2.5198x$    |
|                                    | Hind intestine: $y = -0.0158 + 21.8548x$ |
|                                    | Kidney: $y = -0.0032 + 4.6501x$          |

The equations are for the curve fits shown in Figure 3 using a polynomial, linear equation  $y = b + a*x$  where  $y$  is biomagnification factor and  $x$  is the respective metric value, with constants  $a$  and  $b$  shown (SigmaPlot 13).

**Supplemental Table S2. Multiple linear regression analysis using IBM SPSS Statistics 25.**

**(A) Trout liver *n*BMF linear regression analysis**

**(i) Model Summary**

| Model | R                 | R Square | Adjusted R Square | Std. Error of the Estimate | R Square Change | Change Statistics |     |     | Sig. F Change |
|-------|-------------------|----------|-------------------|----------------------------|-----------------|-------------------|-----|-----|---------------|
|       |                   |          |                   |                            |                 | F Change          | df1 | df2 |               |
| 1     | .911 <sup>a</sup> | .830     | .811              | .2387600                   | .830            | 43.838            | 2   | 18  | .000          |

a. Predictors: (Constant), DissolutionRate, ParticleSize

**(ii) ANOVA<sup>a</sup>**

| Model |            | Sum of Squares | df | Mean Square | F      | Sig.              |
|-------|------------|----------------|----|-------------|--------|-------------------|
| 1     | Regression | 4.998          | 2  | 2.499       | 43.838 | .000 <sup>b</sup> |
|       | Residual   | 1.026          | 18 | .057        |        |                   |
|       | Total      | 6.024          | 20 |             |        |                   |

a. Dependent Variable: BMF\_Liver

b. Predictors: (Constant), DissolutionRate, ParticleSize

**(iii) Coefficients<sup>a</sup>**

| Model |                 | Unstandardized Coefficients |            | Standardized Coefficients | t      | Sig. | 95.0% Confidence Interval for B |             | Correlations |         |      | Collinearity Statistics |       |
|-------|-----------------|-----------------------------|------------|---------------------------|--------|------|---------------------------------|-------------|--------------|---------|------|-------------------------|-------|
|       |                 | B                           | Std. Error |                           |        |      | Lower Bound                     | Upper Bound | Zero-order   | Partial | Part | Tolerance               | VIF   |
| 1     | (Constant)      | -.639                       | .141       |                           | -4.537 | .000 | -.936                           | -.343       |              |         |      |                         |       |
|       | ParticleSize    | .021                        | .003       | .699                      | 7.122  | .000 | .015                            | .027        | .609         | .859    | .693 | .983                    | 1.018 |
|       | DissolutionRate | 28.076                      | 4.033      | .683                      | 6.962  | .000 | 19.603                          | 36.549      | .591         | .854    | .677 | .983                    | 1.018 |

a. Dependent Variable: BMF\_Liver

**(B) Trout mid intestine nBMF linear regression analysis**

**(i) Model Summary**

| Model | R                 | Adjusted R Square | Std. Error of the Estimate | R Square Change | Change Statistics |     |     | Sig. F Change |
|-------|-------------------|-------------------|----------------------------|-----------------|-------------------|-----|-----|---------------|
|       |                   |                   |                            |                 | F Change          | df1 | df2 |               |
| 1     | .822 <sup>a</sup> | .676              | .0278175                   | .676            | 18.799            | 2   | 18  | .000          |

a. Predictors: (Constant), DissolutionRate, ParticleSize

**(ii) ANOVA<sup>a</sup>**

| Model |            | Sum of Squares | df | Mean Square | F      | Sig.              |
|-------|------------|----------------|----|-------------|--------|-------------------|
| 1     | Regression | .029           | 2  | .015        | 18.799 | .000 <sup>b</sup> |
|       | Residual   | .014           | 18 | .001        |        |                   |
|       | Total      | .043           | 20 |             |        |                   |

a. Dependent Variable: BMF\_MidIntestine

b. Predictors: (Constant), DissolutionRate, ParticleSize

**(iii) Coefficients<sup>a</sup>**

| Model |                 | Unstandardized Coefficients |            | Standardized Coefficients | t      | Sig. | 95.0% Confidence Interval for B |             | Correlations |         |      | Collinearity Statistics |       |  |
|-------|-----------------|-----------------------------|------------|---------------------------|--------|------|---------------------------------|-------------|--------------|---------|------|-------------------------|-------|--|
|       |                 | B                           | Std. Error |                           |        |      | Lower Bound                     | Upper Bound | Zero-order   | Partial | Part | Tolerance               | VIF   |  |
| 1     | (Constant)      | -.043                       | .016       |                           | -2.616 | .017 | -.077                           | -.008       |              |         |      |                         |       |  |
|       | ParticleSize    | .001                        | .000       | .560                      | 4.142  | .001 | .001                            | .002        | .471         | .699    | .556 | .983                    | 1.018 |  |
|       | DissolutionRate | 2.362                       | .470       | .680                      | 5.026  | .000 | 1.374                           | 3.349       | .606         | .764    | .674 | .983                    | 1.018 |  |

a. Dependent Variable: BMF\_MidIntestine

**(C) Trout hind intestine nBMF linear regression analysis**

**(i) Model Summary**

| Model | R                 | R Square | Adjusted R Square | Std. Error of the Estimate | R Square Change | Change Statistics |     |     | Sig. F Change |
|-------|-------------------|----------|-------------------|----------------------------|-----------------|-------------------|-----|-----|---------------|
|       |                   |          |                   |                            |                 | F Change          | df1 | df2 |               |
| 1     | .906 <sup>a</sup> | .820     | .799              | .1610478                   | .820            | 38.802            | 2   | 17  | .000          |

a. Predictors: (Constant), DissolutionRate, ParticleSize

**(ii) ANOVA<sup>a</sup>**

| Model |            | Sum of Squares | df | Mean Square | F      | Sig.              |
|-------|------------|----------------|----|-------------|--------|-------------------|
| 1     | Regression | 2.013          | 2  | 1.006       | 38.802 | .000 <sup>b</sup> |
|       | Residual   | .441           | 17 | .026        |        |                   |
|       | Total      | 2.454          | 19 |             |        |                   |

a. Dependent Variable: BMF\_HindIntestine

b. Predictors: (Constant), DissolutionRate, ParticleSize

**(iii) Coefficients<sup>a</sup>**

| Model |                 | Unstandardized Coefficients |            | Standardized Coefficients | t      | Sig. | 95.0% Confidence Interval for B |             | Correlations |         |      | Collinearity Statistics |       |
|-------|-----------------|-----------------------------|------------|---------------------------|--------|------|---------------------------------|-------------|--------------|---------|------|-------------------------|-------|
|       |                 | B                           | Std. Error |                           |        |      | Lower Bound                     | Upper Bound | Zero-order   | Partial | Part | Tolerance               | VIF   |
| 1     | (Constant)      | -.407                       | .098       |                           | -4.148 | .001 | -.614                           | -.200       |              |         |      |                         |       |
|       | ParticleSize    | .014                        | .002       | .729                      | 6.962  | .000 | .010                            | .019        | .598         | .860    | .716 | .964                    | 1.037 |
|       | DissolutionRate | 18.411                      | 2.783      | .693                      | 6.616  | .000 | 12.540                          | 24.282      | .555         | .849    | .680 | .964                    | 1.037 |

a. Dependent Variable: BMF\_HindIntestine

**(D) Trout kidney nBMF linear regression analysis**

**(i) Model Summary**

| Model | R                 | R Square | Adjusted R Square | Std. Error of the Estimate | R Square Change | Change Statistics |     |     | Sig. F Change |
|-------|-------------------|----------|-------------------|----------------------------|-----------------|-------------------|-----|-----|---------------|
|       |                   |          |                   |                            |                 | F Change          | df1 | df2 |               |
| 1     | .783 <sup>a</sup> | .614     | .571              | .0886015                   | .614            | 14.298            | 2   | 18  | .000          |

a. Predictors: (Constant), DissolutionRate, ParticleSize

**(ii) ANOVA<sup>a</sup>**

| Model |            | Sum of Squares | df | Mean Square | F      | Sig.              |
|-------|------------|----------------|----|-------------|--------|-------------------|
| 1     | Regression | .224           | 2  | .112        | 14.298 | .000 <sup>b</sup> |
|       | Residual   | .141           | 18 | .008        |        |                   |
|       | Total      | .366           | 20 |             |        |                   |

a. Dependent Variable: BMF\_Kidney

b. Predictors: (Constant), DissolutionRate, ParticleSize

**(ii) Coefficients<sup>a</sup>**

| Model |                 | Unstandardized Coefficients |            | Standardized Coefficients | t      | Sig. | 95.0% Confidence Interval for B |             | Correlations |         |         | Collinearity Statistics |       |
|-------|-----------------|-----------------------------|------------|---------------------------|--------|------|---------------------------------|-------------|--------------|---------|---------|-------------------------|-------|
|       |                 | B                           | Std. Error |                           |        |      | Lower Bound                     | Upper Bound | Zero-order   | Partial | Partial | Tolerance               | VIF   |
| 1     | (Constant)      | -.181                       | .052       |                           | -3.464 | .003 | -.291                           | -.071       |              |         |         |                         |       |
|       | ParticleSize    | .005                        | .001       | .679                      | 4.598  | .000 | .003                            | .007        | .615         | .735    | .674    | .983                    | 1.018 |
|       | DissolutionRate | 4.955                       | 1.497      | .489                      | 3.311  | .004 | 1.811                           | 8.100       | .400         | .615    | .485    | .983                    | 1.018 |

a. Dependent Variable: BMF\_Kidney

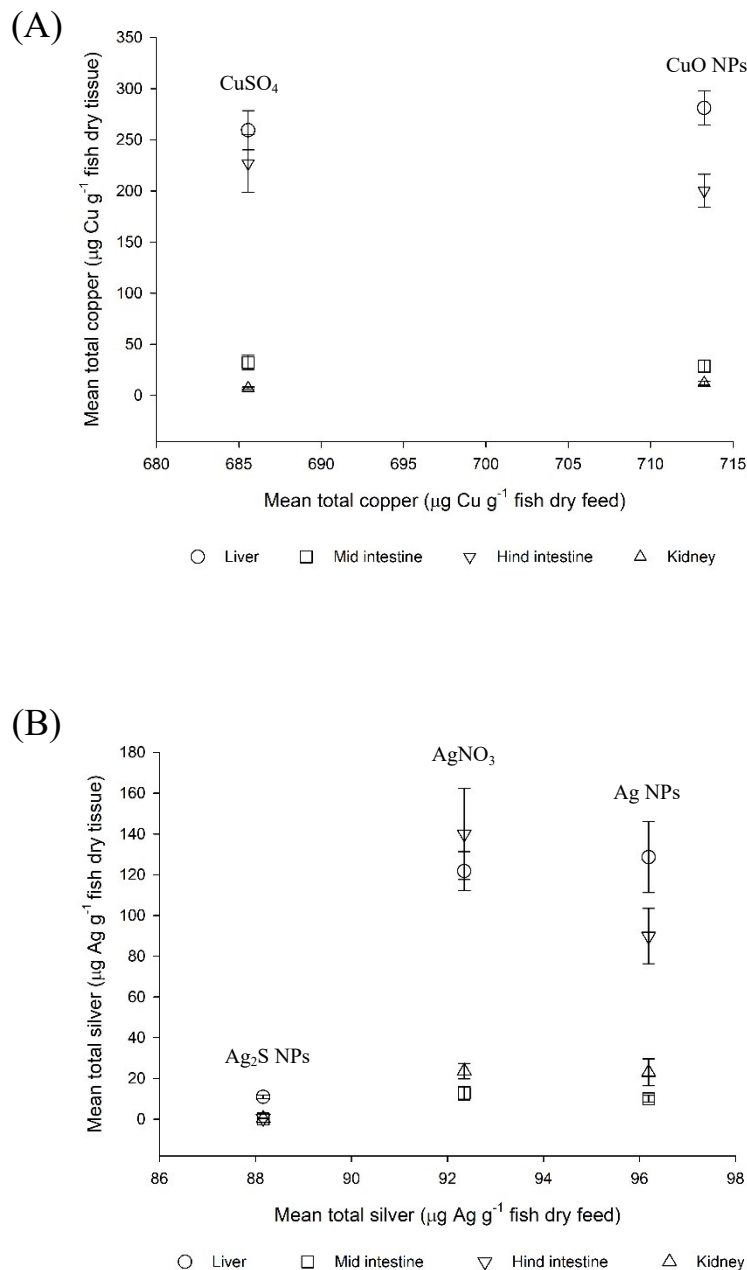

**Figure S1.** Measured total metal concentration in the fish feed plotted against the mean total metal concentration in rainbow trout (*Oncorhynchus mykiss*) tissue (mean  $\pm$  S.E.M,  $n = 4 - 9$ ) as liver, mid intestine, hind intestine and kidney, sampled following the last experimental uptake time point for (A) copper- and (B) silver-based test materials. Copper data sourced from Boyle *et al.*<sup>1</sup> Silver data sourced from Clark *et al.*<sup>2</sup>

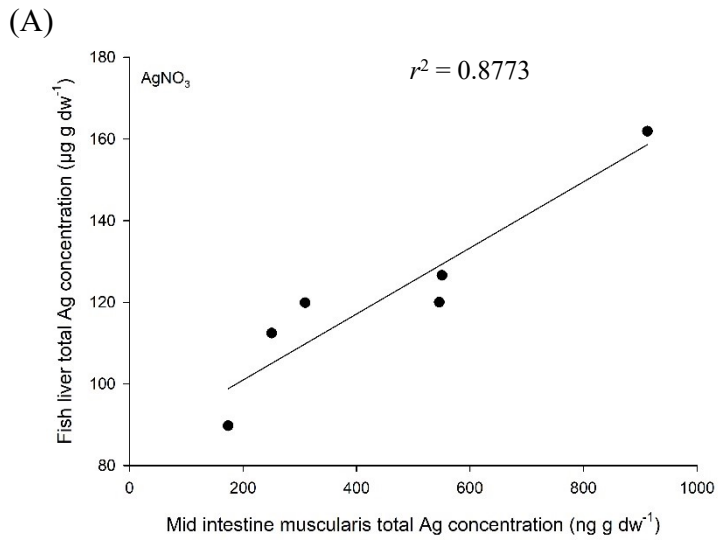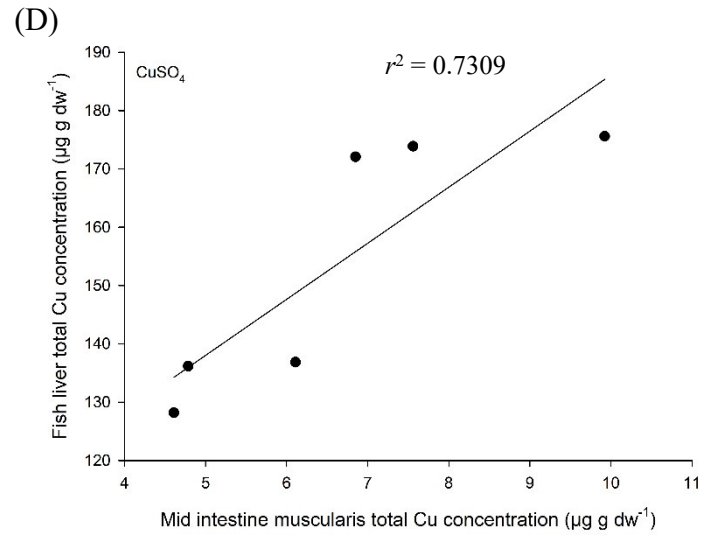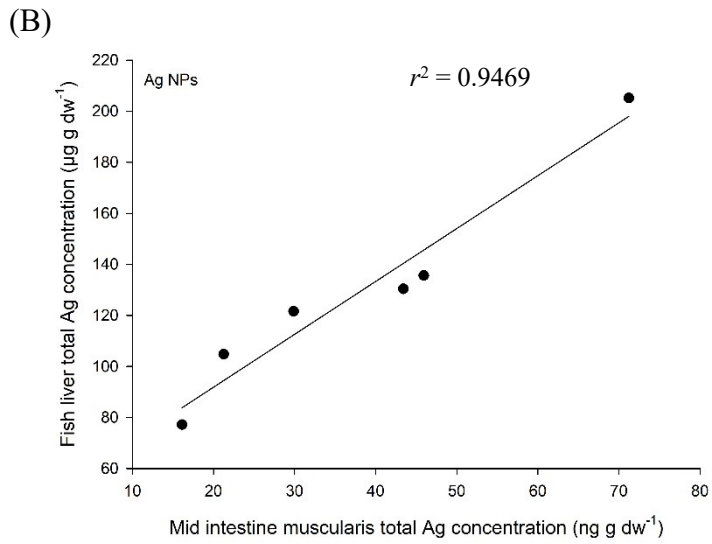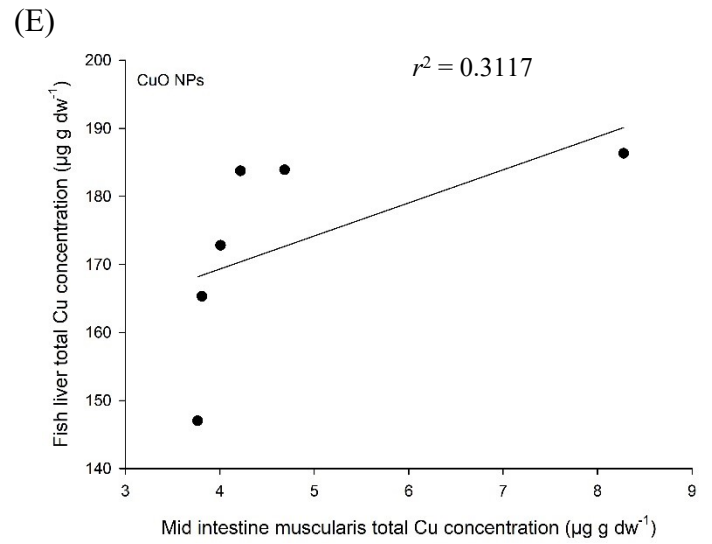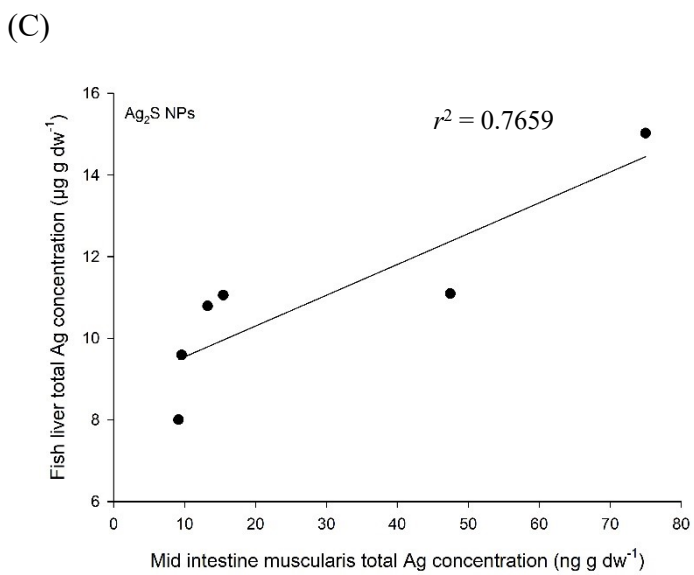



**Figure S2.** Correlations between tier 3 (*ex vivo* exposure, mid intestine muscularis) and tier 4 (*in vivo* exposure, liver concentrations) of the testing strategy. The materials used are silver (left panels) or copper (right panels) based. The data were ranked and then correlated. Copper data sourced from Boyle *et al.*<sup>3</sup> for gut sacs. Silver data sourced from Clark *et al.*<sup>2,4</sup>

## **References**

1. D. Boyle, N. J. Clark, B. P. Eynon and R. D. Handy, Dietary exposure to copper sulphate compared to a copper oxide nanomaterial in rainbow trout: bioaccumulation with minimal physiological effects, *Environmental Science: Nano*, 2021, **8**, 2297-2309.
2. N. J. Clark, D. Boyle, B. P. Eynon and R. D. Handy, Dietary exposure to silver nitrate compared to two forms of silver nanoparticles in rainbow trout: bioaccumulation potential with minimal physiological effects, *Environmental Science: Nano*, 2019, **6**, 1393–1405.
3. D. Boyle, N. J. Clark, T. L. Botha and R. D. Handy, Comparison of the dietary bioavailability of copper sulphate and copper oxide nanomaterials in *ex vivo* gut sacs of rainbow trout: effects of low pH and amino acids in the lumen, *Environmental Science: Nano*, 2020, **7**, 1967-1979.
4. N. J. Clark, R. Clough, D. Boyle and R. D. Handy, Development of a suitable detection method for silver nanoparticles in fish tissue using single particle ICP-MS, *Environmental Science: Nano*, 2019, **6**, 3388-3400.
